# Supplementary material for: Rhizocompartmental microbiomes of arrow bamboo (Fargesia nitida) and their relation to soil properties in Subalpine Coniferous Forests
Source: PeerJ. 2023 Nov 29;11:e16488. doi: 10.7717/peerj.16488 (PMC10693234; doi:10.7717/peerj.16488)
Supplement: Supplemental Information 2 [file peerj-11-16488-s002.xlsx]

## Sheet: Sheet1
	pH	TN(mg/g)	TC(mg/g)	NH4+N(mg/kg)	NO3-N(mg/kg)	MBC(mg C /kg)	MBN(mg N /kg)	Urease(mg/g/24h)	Protease(ug/g/h	Cellulase(mg/kg/h)	Invertase(mg/kg/h)	AP(mg/kg)	AK(mg/kg)	EC(us/cm)
BZ1	6.81333	8.91616	108.393	23.562	65.2618	1041.18	135.463	8.77817	0.320636	0.651592	11.6105	1.97588	282	196
BZ2	6.76	10.5255	127.882	19.8854	102.43	1289.3	158.099	13.4532	2.61035	1.96747	9.86735	2.25706	377	215
BZ3	6.62333	8.85754	98.0114	18.7573	29.7453	639.351	116.071	10.0427	1.90619	3.35951	8.43398	1.71718	273	84.5
BZ4	5.85333	5.48597	69.2387	16.2028	31.9735	229.925	50.1438	4.86129	2.57659	1.55282	12.6786	1.39101	313	147.5
BZ5	4.84667	15.0325	233.035	47.5846	84.1537	587.689	81.2182	3.9026	9.72855	0.698134	5.88641	4.19164	461	132.3
BZ6	4.54667	11.3822	138.515	24.4696	17.1748	470.083	53	3.831	2.34929	0.283485	5.93568	1.91964	242	105.3
BZ7	4.69667	4.00611	45.2922	4.58772	18.3191	184.709	25.0857	1.27937	0.97442	1.39204	13.975	1.58222	139	40.4
BZ8	4.94667	5.79284	71.6637	18.2635	22.5073	561.153	76.2471	4.31801	1.05195	1.1424	11.8338	2.1221	222	74.8
BZ9	5.36	7.21145	85.2169	17.7193	3.14834	544.435	73.8807	13.783	1.15512	1.34549	10.3941	1.49223	262	62.1
SZ1	5.08	5.7165	65.0035	8.17145	21.79	415.828	61.9302	3.16207	3.4216	0.710827	6.27088	2.53825	237	102.5
SZ2	5.34333	6.33842	70.3038	11.908	26.3507	389.883	64.3491	3.49781	1.36078	0.621974	5.36416	1.27853	233	124.2
SZ3	5.24	5.78091	66.9134	11.0154	17.1844	234.867	29.0625	2.24758	0.882793	1.62898	7.34339	1.84091	289	95.6
SZ4	4.69	4.12014	50.6977	6.24059	39.8945	221.208	19.4596	1.41304	0.209781	0.816605	4.35679	1.52598	182	67.2
SZ5	4.28333	6.53748	76.5901	21.2819	64.1903	295.813	25.3914	0.754007	4.72266	1.68398	2.01248	1.14356	235	134.1
SZ6	4.46333	8.51363	108.385	18.9018	54.4247	152.506	3.52061	4.61155	2.36437	2.05632	11.6821	1.70594	305	122.5
SZ7	4.77333	4.26212	54.1098	4.35967	28.4648	529.426	76.4398	2.84888	4.41518	0.596587	9.57007	0.873622	159	51.2
SZ8	5.21667	4.83968	47.2612	7.79077	13.8526	301.943	66.6357	7.54948	0.645452	0.638898	5.63542	1.33477	284	102.4
SZ9	5.34667	4.39777	50.5813	12.5396	37.8747	541.521	104.073	2.81562	0.629807	1.42589	8.59685	1.77342	540	138.2
